# Supplementary material for: High linear energy transfer carbon-ion irradiation upregulates PD-L1 expression more significantly than X-rays in human osteosarcoma U2OS cells
Source: PubMed Central journal article supplement (PMC8438258; doi:10.1093/jrr/rrab050), 2021-07-01
Supplement: supplemental_materials_rrab050.pdf [file supplemental_materials_rrab050.pdf]

# Supplementary Figure 1. No treatment

## Top view

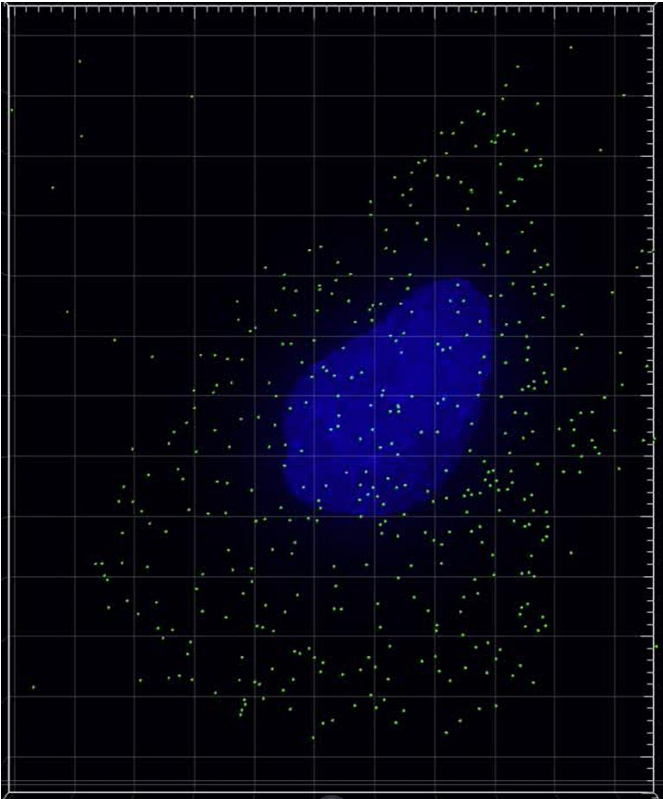

## Angle view

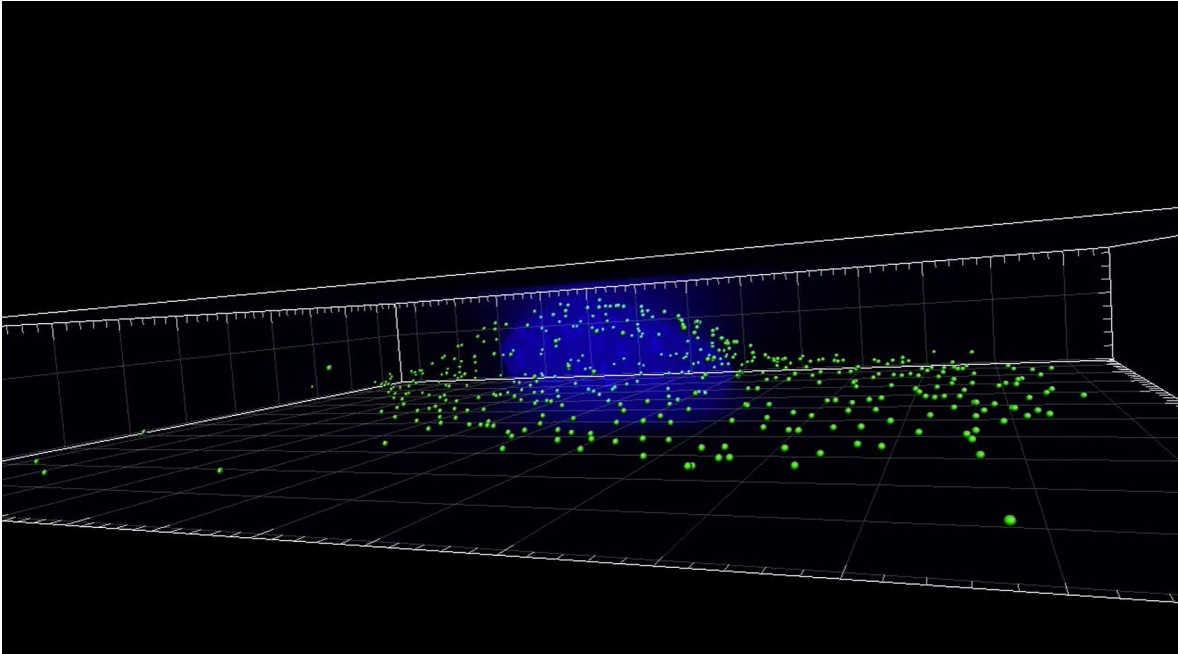

# Supplementary Figure 2. 10 Gy X-ray

## Top view

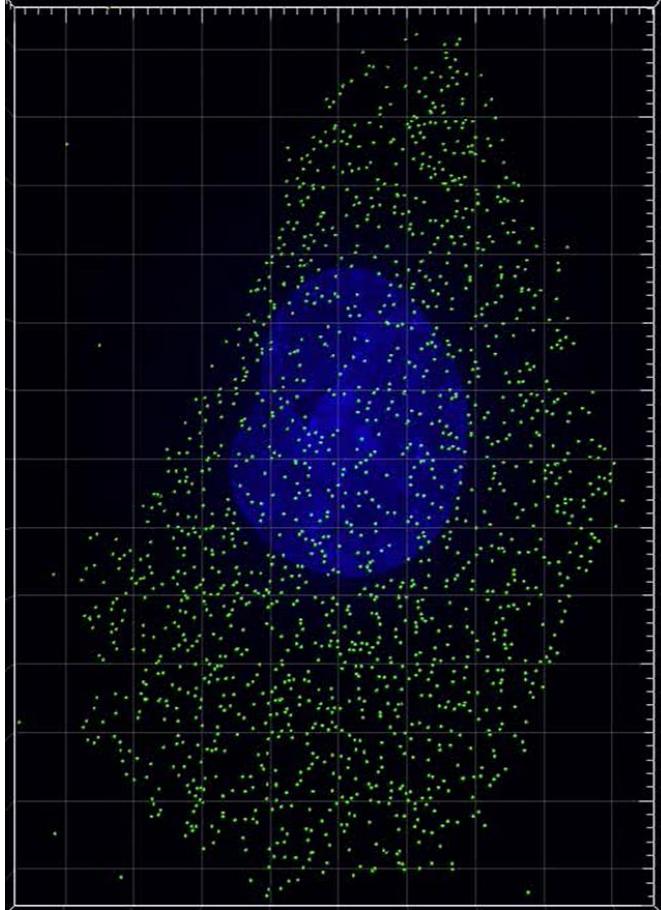

## Angle view

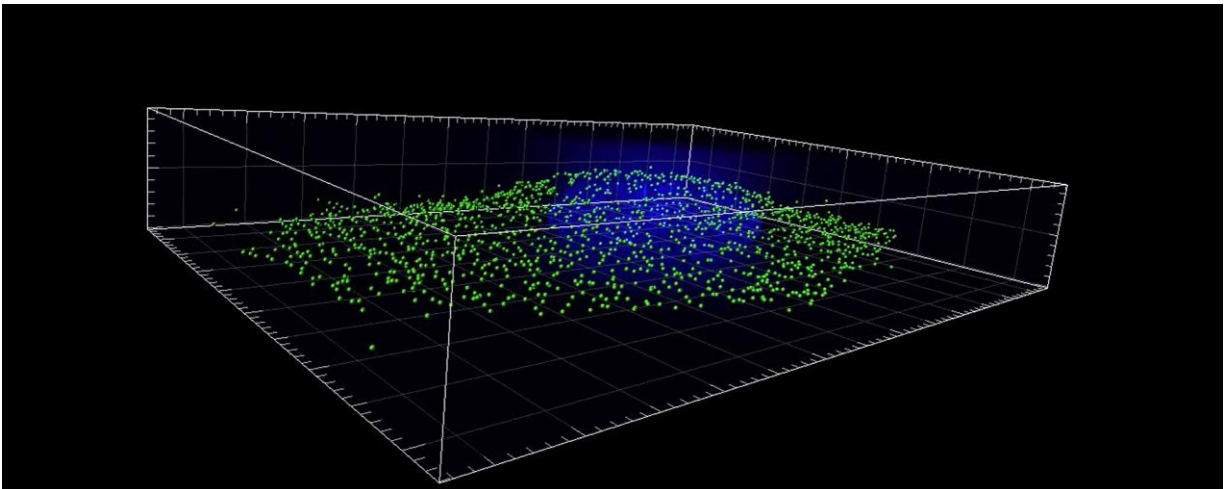

# Supplementary Figure 3

## Top view

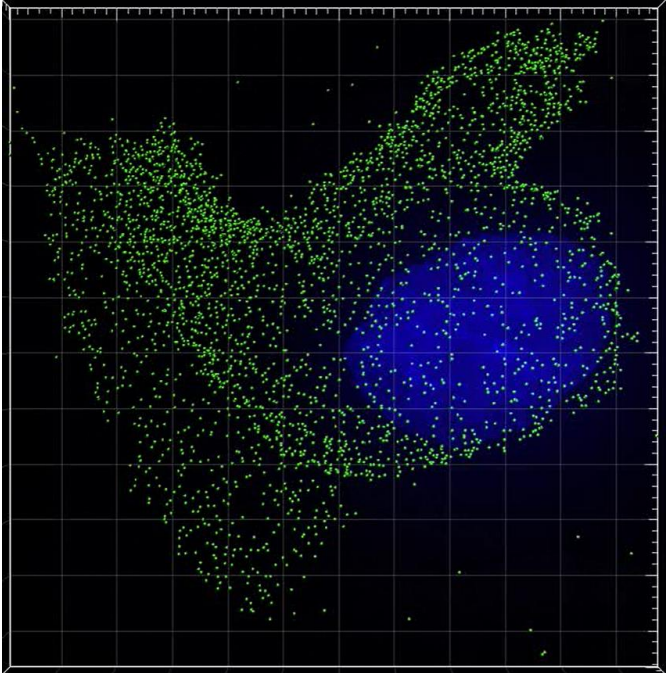

## Angle view

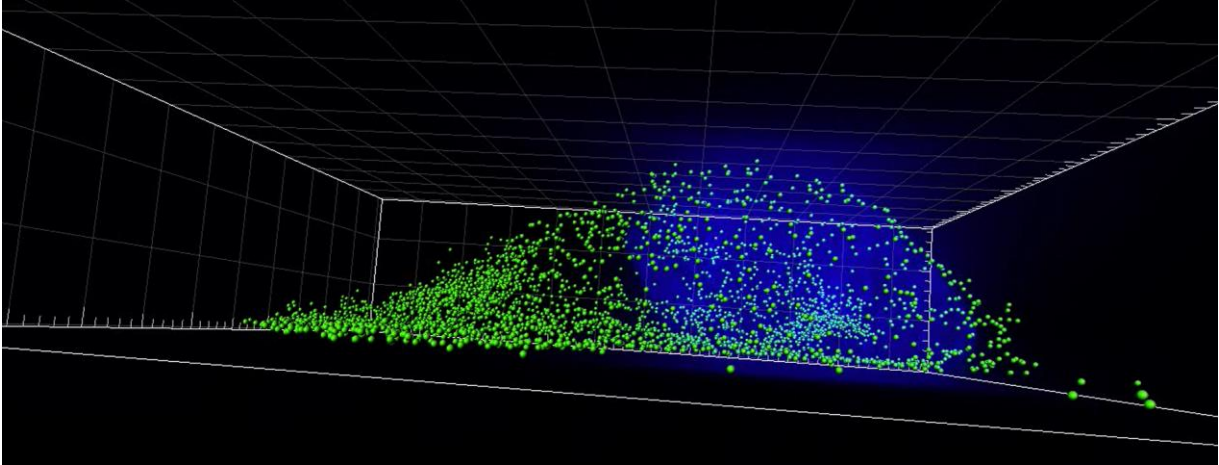

### **Supplementary Figures**

Representative images of cell surface PD-L1 expression in U2OS cells are shown. The distribution of PD-L1 signal was identified using the Spots mode. Green, PD-L1; Blue, DAPI.

**Supplementary Figure 1** No treatment

**Supplementary Figure 2** 10 Gy X-ray irradiation 48 h

**Supplementary Figure 3** 10 Gy carbon-ion irradiation with LET at 60 keV/ $\mu\text{m}$  48 h

**Supplementary Table 1: List of antibodies used in the present study.**

| <b>Target</b>  | <b>Mono/<br/>polyclonal</b> | <b>Clone/<br/>reference</b> | <b>Antibody<br/>raised in</b> | <b>Source</b>        | <b>Dilution for I.B.<br/>or I.F.</b> |
|----------------|-----------------------------|-----------------------------|-------------------------------|----------------------|--------------------------------------|
| Actin          | Mono                        | 8H10D0                      | Mouse                         | Cell Signaling Tech. | 1:10,000 (I.B.)                      |
| Chk1           | Mono                        | 2G1D5                       | Mouse                         | Cell Signaling Tech. | 1:500 (I.B.)                         |
| pChk1          | Mono                        | 133D3                       | Rabbit                        | Cell Signaling Tech. | 1:500 (I.B.)                         |
| IRF1           | Mono                        | D5E4                        | Rabbit                        | Cell Signaling Tech. | 1:1000 (I.B.)                        |
| PARP-1         | Poly                        | 9542                        | Rabbit                        | Cell Signaling Tech. | 1:1000 (I.B.)                        |
| PD-L1          | Mono                        | E1L3N                       | Rabbit                        | Cell Signaling Tech. | 1:1000 (I.B.)<br>1:100 (I.F.)        |
| STAT1          | Mono                        | D1K9Y                       | Rabbit                        | Cell Signaling Tech. | 1:1000 (I.B.)                        |
| STAT1<br>pY701 | Mono                        | 58D6                        | Rabbit                        | Cell Signaling Tech. | 1:200 (I.B.)                         |

I.B., Immunoblotting; I.F., Immunofluorescence

**Supplementary Table 2: List of antibodies used for flow cytometry in the present study.**

| <b>Antibody information for FACS</b>                            | <b>Source</b> |
|-----------------------------------------------------------------|---------------|
| APC Mouse IgG2b, $\kappa$ Isotype Ctrl                          | Biolegend     |
| APC anti-human CD274 (B7-H1, PD-L1),<br>(Mouse IgG1, $\kappa$ ) | Biolegend     |
